## Usefulness of H<sub>2</sub>FPEF score as an independent predictor of heart failure development in patients with atrial fibrillation

Y. Miyasaka, N. Taniguchi, Y. Suwa, E. Nakai, S. Harada, I. Shiojima

Kansai Medical University, Department of Medicine II, Osaka, Japan

**Funding Acknowledgement:** Type of funding source: None

**Background:** The H<sub>2</sub> FPEF score, which based on simple clinical characteristics and echocardiography, enables discrimination of HFpEF from noncardiac causes of dyspnea.

**Purpose:** We sought to evaluate whether H<sub>2</sub> FPEF score predicts congestive heart failure (CHF) development in patients with atrial fibrillation (AF).

**Methods:** Among adult AF patients who underwent transthoracic echocardiography between July 2007 and December 2008, those with preserved left ventricular ejection fraction (LVEF) ( $\geq 50\%$ ) were included and followed up to new-onset CHF events. Patients with a history of CHF, cardiac surgery, or significant left-sided valvular heart disease were excluded. The H<sub>2</sub> FPEF score was calculated from 6 variables (obesity = 2 points, treatment with  $\geq 2$  antihypertensive drugs = 1 point, AF = 3 points, echocardiographic pulmonary artery systolic pressure  $> 35$  mmHg = 1 point, age  $> 60$  years = 1 point, and echocardiographic E/e' ratio  $> 9$  = 1 point). CHF was

ascertained using Framingham criteria. Cox-proportional hazards modeling was used to assess risk of CHF development.

**Results:** Of 562 AF patients, 367 (69 $\pm$ 10 year old, 66% men) met all study criteria. Of whom, 37 (10%) developed CHF events during a mean follow-up of 56 $\pm$ 43 months. The mean H<sub>2</sub> FPEF score was 5.50 $\pm$ 1.14, and the number of patients with H<sub>2</sub> FPEF score  $\geq 7$  was 64 (17%). After adjusting for comorbidities in a multivariate model, H<sub>2</sub> FPEF score was significant predictor of new-onset CHF events both as continuous (HR=1.43, 95% CI: 1.05–1.96,  $P < 0.05$ ) or categorical (H<sub>2</sub> FPEF score  $\geq 7$ ) (HR=2.32, 95% CI: 1.17–4.63,  $P < 0.05$ ) variables. The Kaplan-Meier estimates of CHF-free survival stratified by H<sub>2</sub> FPEF status ( $\geq 7$  or  $< 7$ ) were shown in Figure.

**Conclusion:** H<sub>2</sub> FPEF score provides prognostic information for new-onset CHF development in patients with AF.

Kaplan-Meier Estimates of CHF-free Survival by H<sub>2</sub>FPEF Status

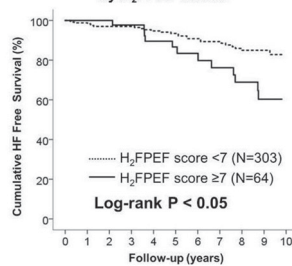

Figure 1
